# Supplementary material for: Gene Disrupting Mutations Associated with Regression in Autism Spectrum Disorder
Source: Springer Nature journal article supplement (doi:10.1007/s10803-017-3256-4), 2017-08-30
Supplement: MOESM2 [file 14958896]

Supplementary Table 2. Clinical Description of Individuals who Experienced Regression

| ID | Gene | Gender | Age at First Concern (mos) | VIQ | NVIQ | ADOS CS | History of Seizures |
| --- | --- | --- | --- | --- | --- | --- | --- |
| 11518 | GPRIN1 | Male | 17 | 13 | 49 | 6 | No |
| 12728 | KIF21A | Male | 9 | 33 | 42 | 9 | Yes |
| 13612 | DST | Male | 16 | 38 | 60 | 10 | No |
| 12009 | UBR3 | Male | 21 | 69 | 87 | 8 | No |
| 12221 | FAM91A1 | Male | 18 | 76 | 99 | 7 | No |
| 14613 | DOCK5  STARD10 | Male | 27 | 19 | 27 | 7 | No |
| 13147 | SORBS1 | Male | 1 | 80 | 82 | 6 | Yes |
| 13497 | RIMS1 | Male | 21 | 40 | 49 | 7 | Yes |
| 11842 | PSD3 | Male | 15 | 15 | 38 | 6 | No |
| 14085 | EIF2AK2 | Male | 33 | 70 | 89 | 8 | No |
| 12817 | FOXP1 | Male | 33 | 37 | 34 | 8 | Yes |
| 12622 | CDAN1 | Male | 18 | 70 | 97 | 9 | No |
| 14490 | ADAMTS9  SYNE1 | Male | 18 | 25 | 55 | 8 | No |
| 11290 | VSIG4  OR4C11  EGFL6  KIAA2022 | Male | 47 | 115 | 119 | 7 | No |
| 11074 | FREM3  MAP3K14  FEZF2  VWCE | Male | 2 | 58 | 75 | 8 | No |
| 12843 | TYW5 | Male | 6 | 84 | 101 | 7 | No |
| 13851 | SUCLG2 | Male | 17 | 16 | 40 | 9 | No |
| 14592 | SPDYC | Male | 21 | 21 | 32 | 8 | No |
| 12652 | SPATA13 | Male | 18 | 69 | 79 | 8 | No |
| 13602 | SDCCAG3 | Male | 30 | 47 | 53 | 7 | No |
| 13349 | NUAK1 | Male | 12 | 69 | 100 | 8 | No |
| 14068 | MYH2 | Male | 15 | 18 | 50 | 6 | No |
| 11078 | MUC5B | Male | 6 | 26 | 33 | 10 | No |
| 12473 | MOV10 | Male | 14 | 34 | 50 | 9 | No |
| 14114 | ANO9 | Male | 25 | 20 | 34 | 9 | No |
| 12561 | ADAM33 | Male | 12 | 103 | 101 | 6 | No |
| 14233 | CHD8 | Male | 21 | 6 | 19 | 7 | No |
| 12703 | RAI1 | Male | 12 | 61 | 58 | 9 | No |
| 13818 | CHD2 | Male | 36 | 74 | 82 | 9 | Yes |
| 11160 | SPEN | Female | 28 | 99 | 119 | 10 | Yes |
| 13905 | ANKRD11 | Female | 36 | 89 | 67 | 9 | No |
| 11114 | SCN2A | Female | 19 | 30 | 45 | 8 | No |
| 12118 | COL25A1 | Female | 16 | 102 | 74 | 10 | Yes |
| 12565 | SETD2 | Female | 15 | 83 | 79 | 8 | Yes |

Notes:

-Age at First Concern extracted from Item Number 2 of the *Autism Diagnostic Interview-Revised* (Rutter et al., 2003)

-Nonverbal IQ/Verbal IQ scores are standardized, with *Mean* Standard Score = 100, *standard deviation* = 15

-ADOS Calibrated Severity Scores (now referred to as Comparison Scores [Gotham et al., 2012]) range from 1-10, with scores greater than 3 meeting the classification threshold for ASD on the ADOS (Gotham et al., 2009)
